# Supplementary material for: Reviews & Syntheses: Arctic Fire Regimes and Emissions in the 21st Century
Source: Copernicus journal article supplement (doi:10.5194/bg-2021-83), 2021-04-08
Supplement: Supplementary file 1 [file bg-2021-83-supplement.pdf]

# Supplementary Material

## Reviews & Syntheses: Arctic Fire Regimes and Emissions in the 21st Century

Jessica L. McCarty<sup>1</sup>, Juha Aalto<sup>2,3</sup>, Ville-Veikko Paunu<sup>4</sup>, Steve R. Arnold<sup>5</sup>, Sabine Eckhardt<sup>6</sup>, Zbigniew Klimont<sup>7</sup>, Justin J. Fain<sup>1</sup>, Nikolaos Evangeliou<sup>6</sup>, Ari Venäläinen<sup>2</sup>, Nadezhda M. Tchebakova<sup>8</sup>, Elena I. Parfenova<sup>8</sup>, Kaarle Kupiainen<sup>9</sup>, Amber J. Soja<sup>10,11</sup>, Lin Huang<sup>12</sup>, and Simon Wilson<sup>13</sup>

<sup>1</sup>Department of Geography and Geospatial Analysis Center, Miami University, Oxford, OH, USA

<sup>2</sup>Finnish Meteorological Institute, Helsinki, Finland

<sup>3</sup>Department of Geosciences and Geography, University of Helsinki, Helsinki, Finland

<sup>4</sup>Finnish Environment Institute (SYKE), Helsinki, Finland

<sup>5</sup>Institute for Climate and Atmospheric Science, School of Earth and Environment, University of Leeds, Leeds, United Kingdom

<sup>6</sup>Norwegian Institute for Air Research, Kjeller, Norway

<sup>7</sup>International Institute for Applied Systems Analysis (IIASA), Laxenburg, Austria

<sup>8</sup>V. N. Sukachev Institute of Forests, Siberian Branch, Russian Academy of Sciences, Krasnoyarsk, Russian Federation

<sup>9</sup>Ministry of the Environment Finland, Aleksanterinkatu 7, Helsinki, P.O.Box 35, FI-00023 Government, Finland

<sup>10</sup>National Institute of Aerospace, Hampton, VA, USA

<sup>11</sup>Langley Research Center, Hampton, VA, USA

<sup>12</sup>Climate Research Division, ASTD/STB, Environment and Climate Change Canada, Toronto, Canada

<sup>13</sup>Arctic Monitoring and Assessment Programme (AMAP) Secretariat, Tromsø, Norway

Supplemental Tables and Figures

**Table S1: Key terms referenced in the manuscript.**

| Key Term             | Definition used in this manuscript                                                                                                                                                                       |
|----------------------|----------------------------------------------------------------------------------------------------------------------------------------------------------------------------------------------------------|
| Fire regime          | Fire activity for a region or landscape defined by fire frequency, typical sizes of fires, annual burned area, severity, seasonality, fire type, and ignition source.                                    |
| Fire risk            | Likelihood of a fire occurring; no typical fire behavior or intensity is assumed.                                                                                                                        |
| Fire season          | General time period that fires have occurred in the recent past (i.e., decade); in the boreal and Arctic this is often variable based on snow cover, depth, and melt as well as onset of winter weather. |
| Open biomass burning | All vegetative biomass burning across wildland and human-dominated landscapes, including wildfires, forest fires, agricultural open burning, and prescribed burning.                                     |

26

27 **Table S2.** Black carbon emissions in teragrams (Tg) from reported statistics on burned area in the Arctic member states; sources for  
 28 burned area from <sup>a</sup>(Alaska Division of Forestry, 2020); <sup>b</sup>(CIFFC, 2020) ; <sup>c</sup>(Markuse, 2019); <sup>d</sup>(DSB, 2020); <sup>e</sup>(Betänkande av 2018 års  
 29 skogsbrandsutredning, 2019); <sup>f</sup>(Ketola, 2020); <sup>g</sup>(ФБУ "АВИАЛЕСООХРАНА", 2019); fuel loadings and combustion completeness from  
 30 Van Leeuwen et al. (2014) for boreal forests, with tundra values used for Greenland and temperate forests for the CONUS; emission  
 31 factors for BC taken from GFEDv4s with 0.5 g/kg assigned to boreal forest ecosystems, 0.55 g/kg assigned to temperate forests, and 0.04  
 32 g/kg assigned to peat for Greenland.

33

| Country/<br>Region    | Year | Official<br>Burned Area<br>(km <sup>2</sup> ) | Fuel<br>Loading<br>(kg/km <sup>2</sup> ) | Black Carbon<br>Emission Factor<br>(g/kg) | Combustion<br>Completeness (%) | Black Carbon<br>Emission (Tg) |
|-----------------------|------|-----------------------------------------------|------------------------------------------|-------------------------------------------|--------------------------------|-------------------------------|
| USA/<br>Alaska        | 2019 | 10,481 <sup>a</sup>                           | 1080                                     | 0.5                                       | 47                             | 2.66E-06                      |
| Canada                | 2019 | 18,389 <sup>b</sup>                           | 1080                                     | 0.5                                       | 47                             | 4.67E-06                      |
| Denmark/<br>Greenland | 2019 | 8 <sup>c</sup>                                | 1650                                     | 0.04                                      | 24                             | 1.27E-10                      |
| Norway                | 2019 | 0.03 <sup>d</sup>                             | 1080                                     | 0.5                                       | 47                             | 7.61E-12                      |
| Sweden                | 2018 | 250 <sup>e</sup>                              | 1080                                     | 0.5                                       | 47                             | 6.30E-08                      |
| Finland               | 2019 | 6 <sup>f</sup>                                | 1080                                     | 0.5                                       | 47                             | 2.00E-09                      |
| Russia                | 2019 | 100,785 <sup>g</sup>                          | 1080                                     | 0.5                                       | 47                             | 2.56E-05                      |
| USA/<br>CONUS         | 2019 | 18,876 <sup>h</sup>                           | 1610                                     | 0.55                                      | 61                             | 1.02E-05                      |

34

35

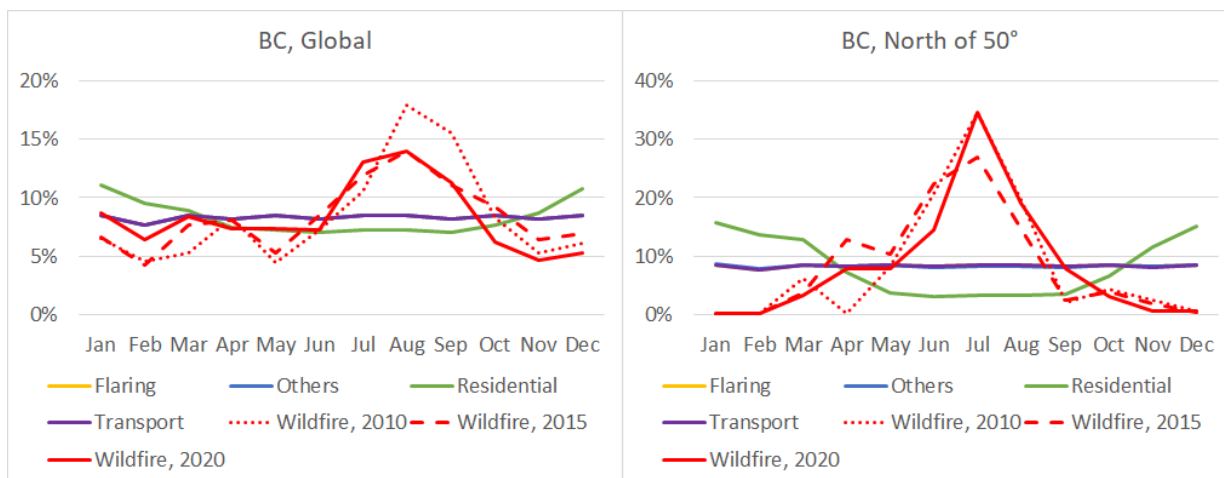

37

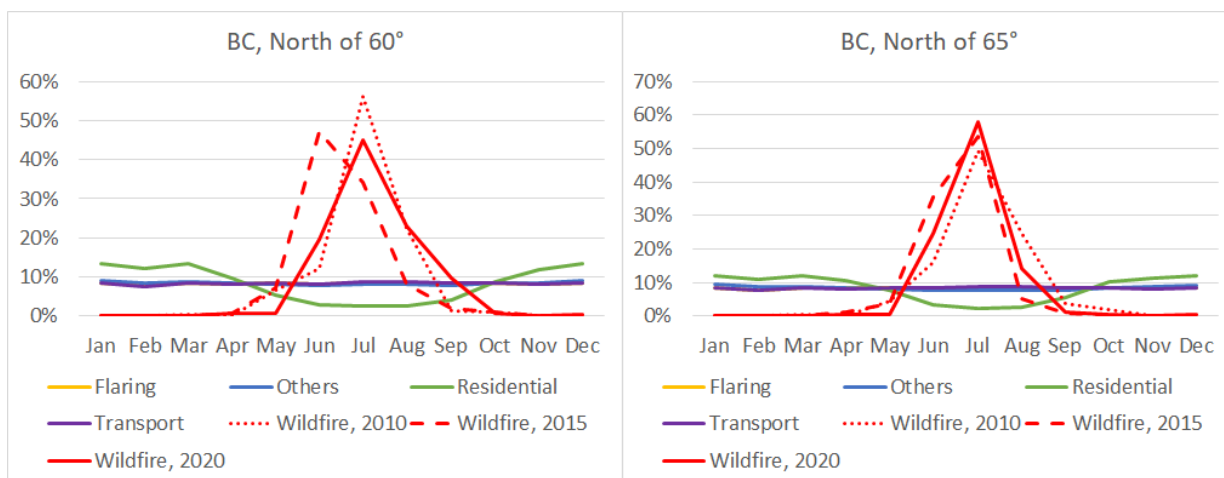

38

39 **Figure S1.** Percentage of monthly emissions of the annual total for each sector from 2015 GAINS anthropogenic sources and 2010, 2015,  
 40 and 2020 GFAS wildfire estimates.

41

42 **Table S3.** Sectoral black carbon emissions in kilotons above 60° N and 65° N for 2010, 2015, and 2020.

| <b>BC (kilotons)</b> | <b>Residential</b> | <b>Transport</b> | <b>Flaring</b> | <b>Others</b> | <b>Wildfire</b> | <b>Total</b> |
|----------------------|--------------------|------------------|----------------|---------------|-----------------|--------------|
| <b>North of 60°</b>  | <b>22</b>          | <b>32</b>        | <b>141</b>     | <b>6</b>      | <b>315</b>      | <b>516</b>   |
| 2010                 | 9                  | 14               | 56             | 2             | 84              | 165          |
| 2015                 | 7                  | 11               | 41             | 2             | 63              | 124          |
| 2020                 | 6                  | 8                | 44             | 2             | 168             | 227          |
| <b>North of 65°</b>  | <b>3</b>           | <b>10</b>        | <b>52</b>      | <b>1</b>      | <b>128</b>      | <b>194</b>   |
| 2010                 | 1                  | 4                | 21             | 0             | 18              | 44           |
| 2015                 | 1                  | 3                | 15             | 0             | 17              | 37           |
| 2020                 | 1                  | 2                | 16             | 1             | 93              | 113          |

43

44

45

46

47

48

49

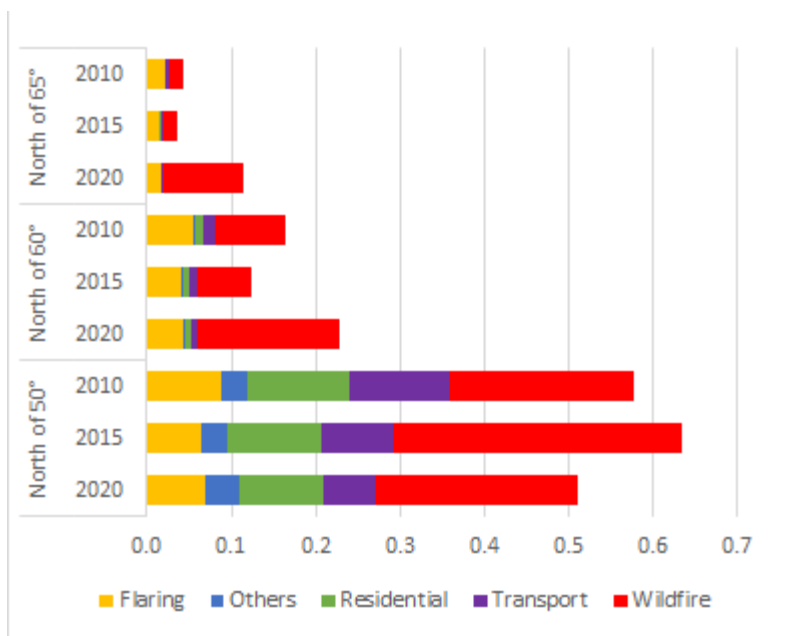

51

52 **Figure S2.** Sectoral black carbon emissions in Tg above 50°N, 60°N, and 65°N for 2010, 2015, and 2020.
